# Supplementary material
Source: Springer Nature journal article supplement (https://www.springermedizin.de/resource/supplementary/12889_2013_6104_MOESM6_ESM.pdf/9494372)

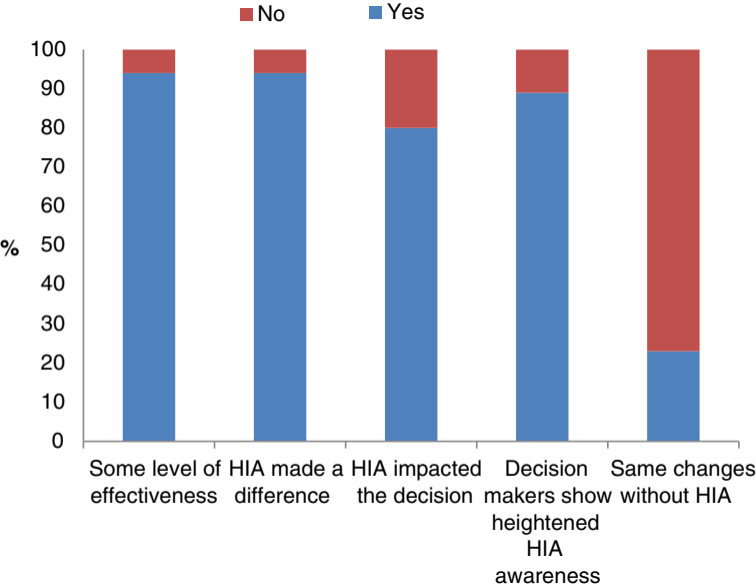

Supplement: MOESM6 [file 9494372]
